# Supplementary material for: The orphan G protein-coupled receptor GPR55 promotes cancer cell proliferation via ERK
Source: Springer Nature journal article supplement (doi:10.1038/onc.2010.402), 2010-09-06
Supplement: 41388_2011_BFonc2010402_MOESM31_ESM.pdf [file 41388_2011_BFonc2010402_MOESM31_ESM.pdf]

C. Andradas *et al.*

Supplemental Table 1

| Cell line | Origin                            | GPR55 expression | Cell line  | Origin                   | GPR55 expression |
|-----------|-----------------------------------|------------------|------------|--------------------------|------------------|
| A172      | Glioblastoma                      | +                | BT-474     | Breast ductal carcinoma  | +                |
| CCF-STTG1 | Astrocytoma                       | ++               | EVSA-T     | Breast adenocarcinoma    | ++               |
| GOS-3     | Astrocytoma/<br>Oligodendroglioma | ++               | MCF-7      | Breast adenocarcinoma    | +                |
| H4        | Neuroglioma                       | +                | MDA-MB-231 | Breast adenocarcinoma    | +                |
| LN-405    | Astrocytoma                       | ++               | MDA-MB-468 | Breast adenocarcinoma    | +                |
| SW 1088   | Astrocytoma                       | +                | SK-BR-3    | Breast adenocarcinoma    | -                |
| SW 1783   | Astrocytoma                       | +                | T-47D      | Breast ductal carcinoma  | -                |
| T98G      | Astrocytoma                       | ++               | A-375      | Melanoma                 | ++               |
| U-87 MG   | Astrocytoma                       | +                | HeLa       | Cervix adenocarcinoma    | +                |
| U-118 MG  | Astrocytoma                       | +                | Hep-G2     | Hepatocellular carcinoma | +                |
| U-373 MG  | Astrocytoma                       | +                | JURKAT     | T cell leukemia          | +                |
|           |                                   |                  | IM-9       | B lymphoblastoid myeloma | ++               |
|           |                                   |                  | MIA PaCa-2 | Pancreas carcinoma       | +                |

**Table S1. Human cancer cell lines express GPR55 mRNA.** Human cell lines were obtained from The American Type Culture Collection (Manassas, VA) and the German Collection of Microorganisms and Cell Cultures (DSMZ, Braunschweig, Germany). RNA was isolated with Trizol Reagent (Invitrogen, Carlsbad, CA), including a DNase digestion step, with the Real Star Kit (Durviz, Valencia, Spain), and cDNA was obtained with Transcriptor Reverse Transcriptase (Roche, Basel, Switzerland). The primers used for real time-quantitative PCR for human GPR55 were: sense 5'-CTGCCTTGGTTCCACCATA-3' and antisense 5'-CCAGGATGCAGGTGAGTAAGA-3'. The probe was from the Universal Probe Library (Roche). 18S RNA was used as reference.
